# Supplementary material
Source: publisher figshare collection journal article supplement (https://acs.figshare.com/ndownloader/files/5089831)
Supplement: Supplementary file 1 [file 5089831]

**Supporting Information for “Synthesis and Properties of Well-Defined Elastomeric  
Poly(alkylnorbornene)s and Their Hydrogenated Derivatives” (John D. Hatjopoulos and  
Richard A. Register, submitted as a Note to *Macromolecules*)**

**Polymerization Details.** Norbornene (99%) and trimethylphosphine ( $\text{PMe}_3$ , 97%) were purchased from Aldrich and purified by vacuum transfer from Na. Toluene was purified by vacuum transfer from sodium benzophenone ketyl. Benzaldehyde (Aldrich 99.5%, Sure-Seal) was used as received to terminate polymerizations of hexylnorbornene and decylnorbornene; propionaldehyde (Aldrich, 97%) was vacuum-transferred from  $\text{CaSO}_4$  and used to terminate norbornene, methylnorbornene, and butylnorbornene polymerizations. After termination, the polymers were recovered by precipitation into methanol and vacuum-dried.

**Table S1. Polymerization Rate Constants for 5-*n*-Alkylnorbornene**

| <b>Monomers at 26°C<sup>a</sup></b> |                |               |            |            |
|-------------------------------------|----------------|---------------|------------|------------|
| monomer                             | $[\text{M}]_i$ | $[\text{Mo}]$ | $k_p$      | $k'_p$     |
|                                     | (mol/l)        | (mmol/l)      | (l/mol-hr) | (l/mol-hr) |
| norbornene                          | 0.368          | 0.692         | 28000      | 12000      |
| methylnorbornene                    | 0.320          | 0.346         | -          | -          |
| butylnorbornene                     | 0.230          | 0.346         | -          | -          |
| hexylnorbornene                     | 0.194          | 0.346         | -          | 9100       |
| decylnorbornene                     | 0.148          | 0.346         | -          | 7500       |

<sup>a</sup> $[\text{M}]_i$  represents the starting concentration of monomer,  $[\text{Mo}]$  that of initiator.  $k_p$  is the bimolecular rate constant;  $k'_p$  is the same in the presence of a 5:1 molar ratio of  $\text{PMe}_3$ :Mo.

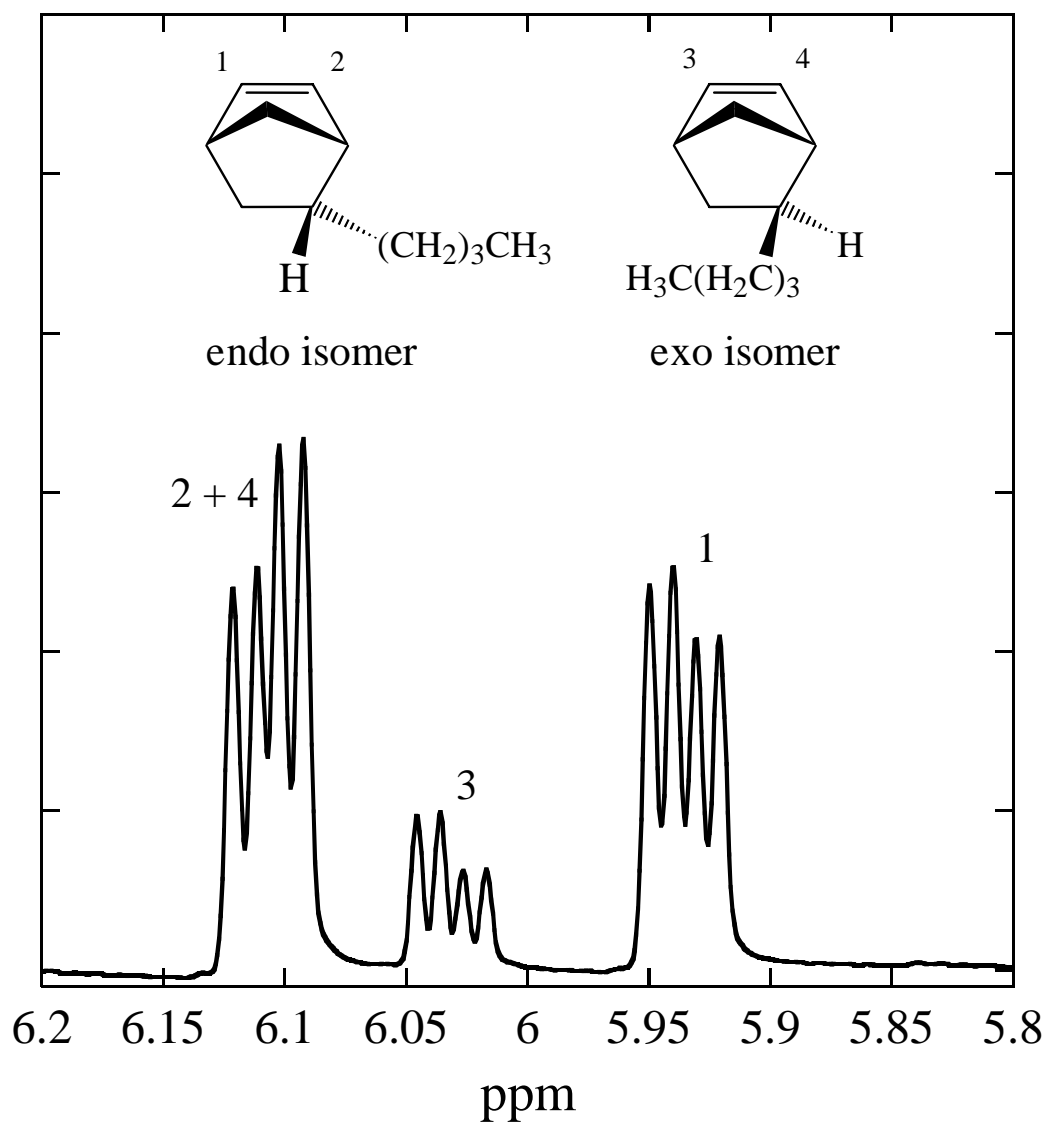

**Figure S1.** Olefinic region of the  $^1\text{H}$  NMR spectrum of 5-*n*-butylbicyclo[2.2.1]hept-2-ene monomer. The endo/exo ratio is found to be 76/24 from the areas of the indicated resonances.

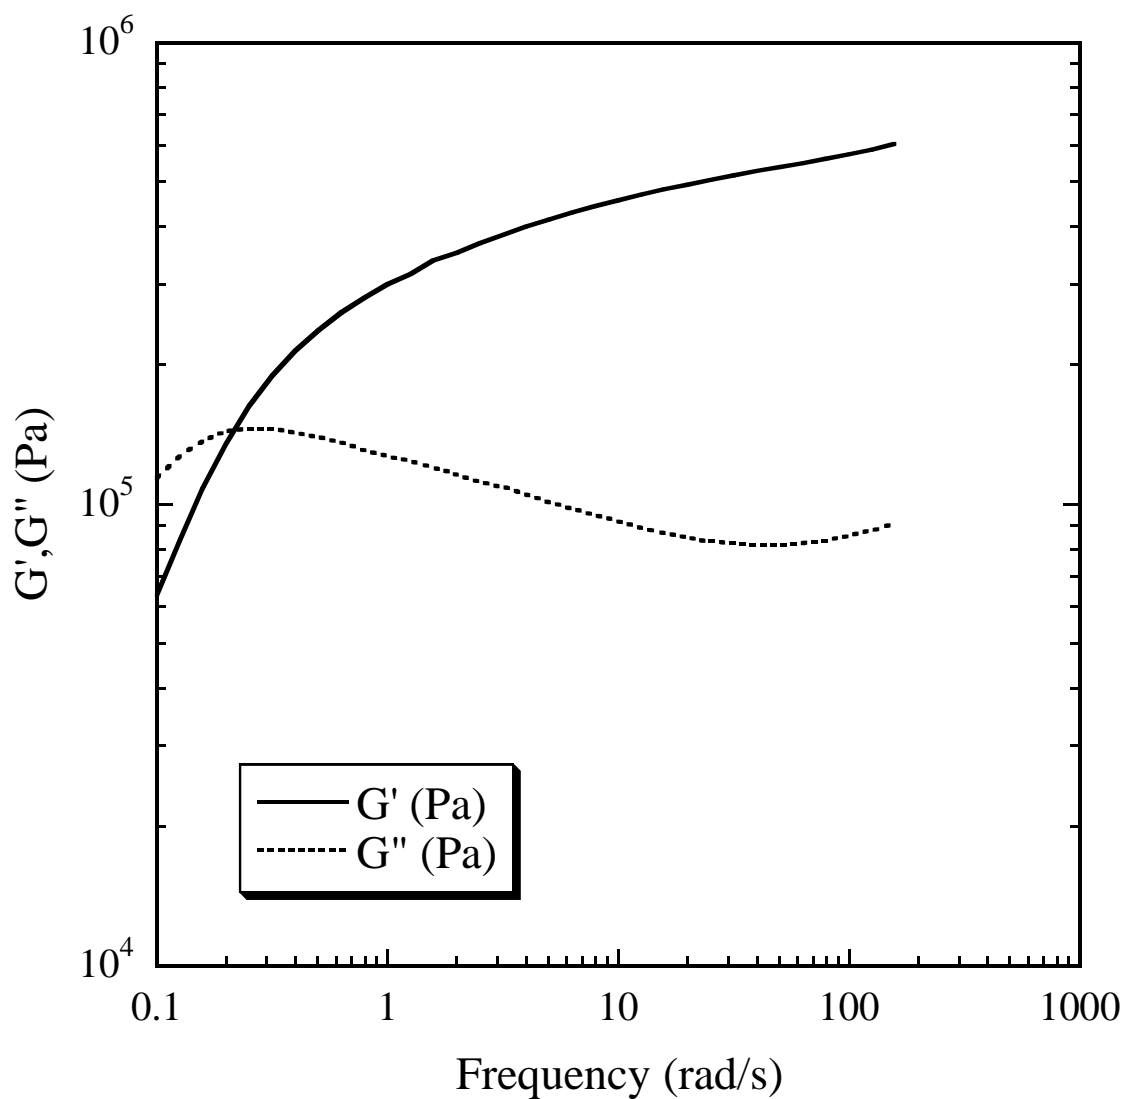

**Figure S2.** Dynamic frequency sweep at 31°C for hydrogenated poly(butyl norbornene). The plateau modulus  $G_0 = 0.54$  MPa is evaluated from the value of  $G'$  at  $\omega = 45$  rad/sec, where  $G''$  shows a minimum.

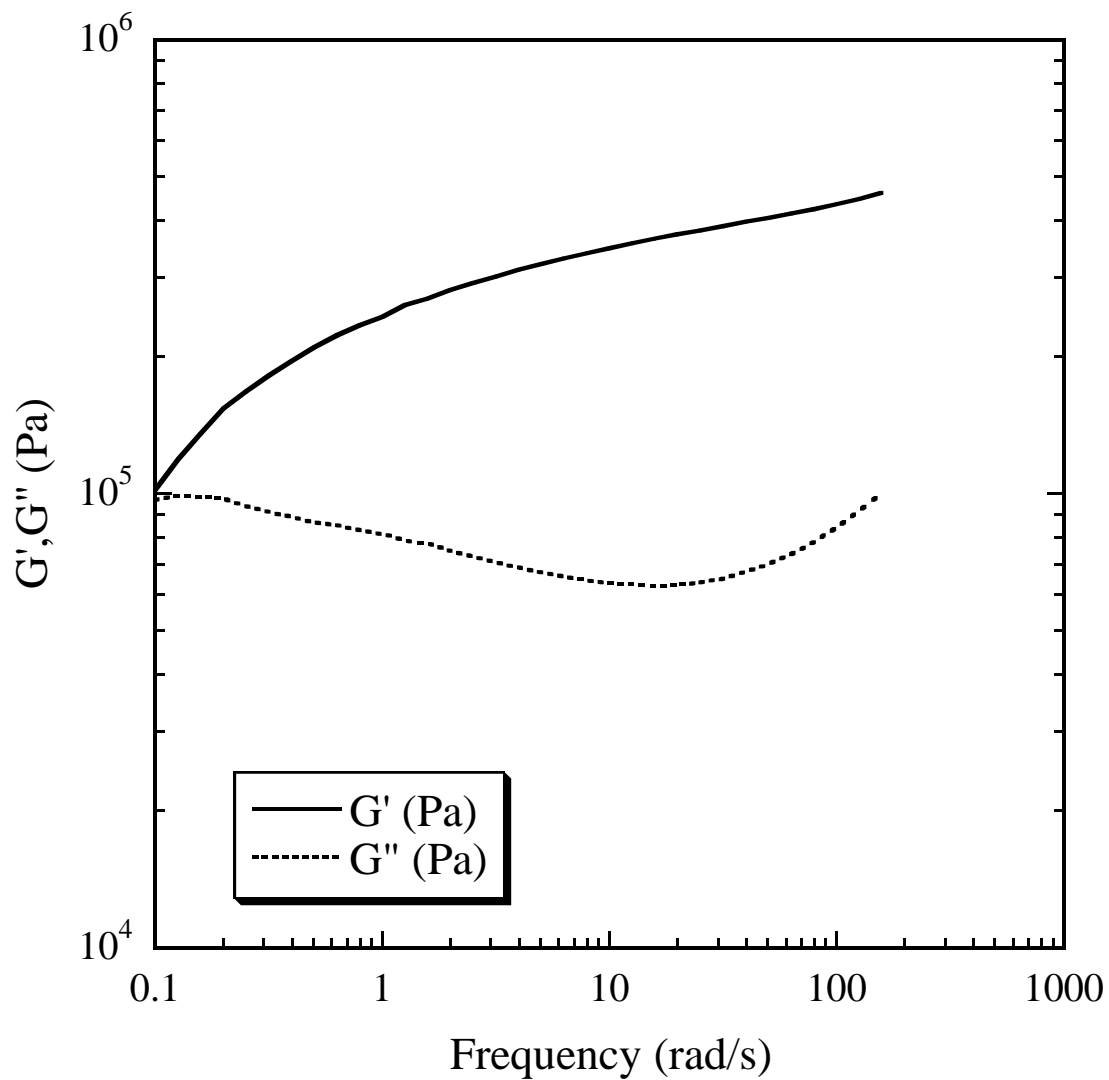

**Figure S3.** Dynamic frequency sweep at 31°C for hydrogenated poly(hexylnorbornene). The plateau modulus  $G_0 = 0.37$  MPa is evaluated from the value of  $G'$  at  $\omega = 16$  rad/sec, where  $G''$  shows a minimum.

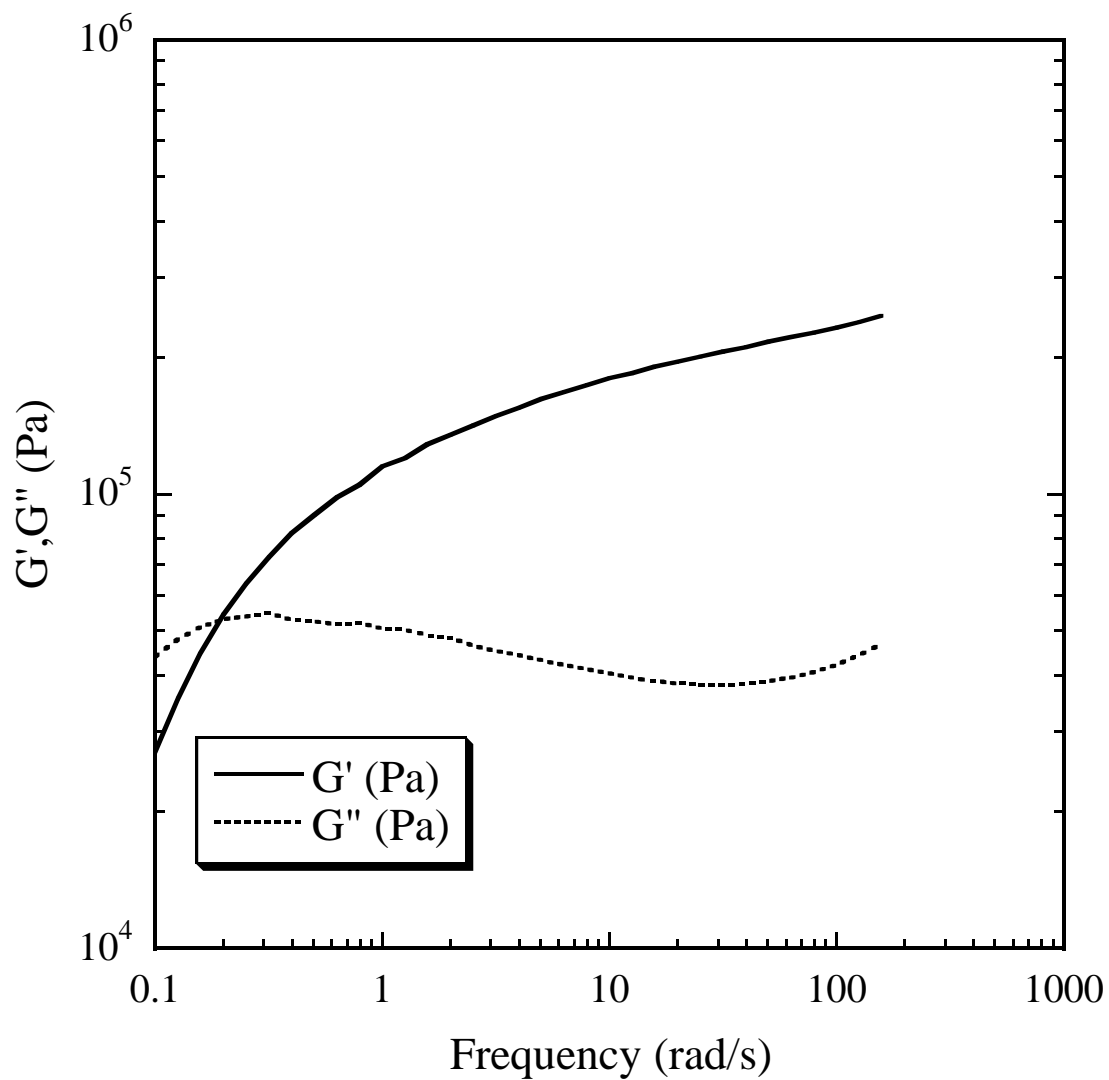

**Figure S4.** Dynamic frequency sweep at 31°C for hydrogenated poly(decylnorbornene). The plateau modulus  $G_0 = 0.20$  MPa is evaluated from the value of  $G'$  at  $\omega = 30$  rad/sec, where  $G''$  shows a minimum.
